# Supplementary material for: Ground beetles in Mediterranean olive agroecosystems: Their significance and functional role as bioindicators (Coleoptera, Carabidae)
Source: PubMed Central journal article supplement (PMC5860759; doi:10.1371/journal.pone.0194551), 2018-03-20
Supplement: pone.0194551.s001.pdf [file pone.0194551.s001.pdf]

**S1 Table. Species by sites table.** Sites and species have been clustered following the classification of Figures 2 (groups A, B and C) and 3 (groups 4, 2, 1 and 3).

The species traits have been coded in the first six columns (see table 2 in the text). The name of the species has been coded by merging the first four letters of the genus with the first four letters of the species name.

Figures in bold outline the central value, while figures underlined outline the nuclear value (see text under Methods chapter)

|      |       |      |      |      |         | clusters                                            | A         |           |              | B            |              |         |         |              |               |              | C            |              |              |         |              |               |               |               |               |               |               |       |
|------|-------|------|------|------|---------|-----------------------------------------------------|-----------|-----------|--------------|--------------|--------------|---------|---------|--------------|---------------|--------------|--------------|--------------|--------------|---------|--------------|---------------|---------------|---------------|---------------|---------------|---------------|-------|
|      |       |      |      |      |         | masl                                                | 300       | 300       | 300          | 300          | 5            | 5       | 5       | 5            | 300           | 206          | 210          | 50           | 75           | 73      | 45           | 71            | 60            | 170           |               |               |               |       |
|      |       |      |      |      |         | management                                          | cover-c   | tilled    | tilled       | tilled       | cover-c      | cover-c | cover-c | cover-c      | tilled        | cover-c      | cover-c      | half-c       | half-c       | half-c  | half-c       | half-c        | cover-c       |               |               |               |               |       |
|      |       |      |      |      |         | soil                                                | sand-clay | sand-clay | sand-clay    | sand-clay    | alluv        | alluv   | alluv   | alluv        | sand-clay     | sand-clay    | sand-clay    | clay         | clay         | clay    | clay         | clay          | sand-clay     |               |               |               |               |       |
|      |       |      |      |      |         | climax                                              | Q.virg    | Q.virg    | Q.virg       | Q.virg       | mix.for      | mix.for | mix.for | mix.for      | Q.virg        | Q.virg       | Q.virg       | sclerof      | sclerof      | sclerof | sclerof      | sclerof       | sclerof       |               |               |               |               |       |
|      |       |      |      |      |         | sites                                               | REN5      | REN2      | REN1         | REN3         | MIR1         | MIR2    | MIR4    | REN4         | REN6          | REN7         | TER5         | TER1         | TER2         | TER6    | TER3         | TER4          | TER7          |               |               |               |               |       |
| Repr | Chor  | Wing | Size | Food | Habitat | species                                             |           |           |              |              |              |         |         |              |               |              |              |              |              |         |              |               |               |               |               |               |               |       |
| 2Y   | II    | b    | s2   | G    | F       | Platyderus neapolitanus Binagli in Magistretti 1955 | 4         | Platneap  | <b>0.048</b> |              |              |         |         |              |               |              |              |              |              |         |              |               |               |               |               |               |               |       |
| S    | IV    | m    | s4   | Om   | O       | Acinopus picipes (Olivier 1795)                     |           | Acinpici  | <b>0.048</b> |              |              |         |         |              |               |              |              |              |              |         |              |               |               |               |               |               |               |       |
| U    | IV    | d    | s2   | Om   | O       | Ophonus azureus (F. 1775)                           |           | Ophoazur  | <b>0.605</b> |              |              |         |         |              |               | 0.076        | 0.028        |              |              |         |              | 0.024         |               |               |               |               |               |       |
| S    | IV    | m    | s4   | P    | O       | Ditomus calydonius calydonius (Rossi 1790)          |           | Ditocaly  | <b>0.169</b> |              |              |         |         |              |               |              |              |              |              |         |              | 0.025         |               |               |               |               |               |       |
| A    | IV    | m    | s2   | P    | O       | Ophonus puncticeps Stephens 1828                    |           | Ophopunc  | <b>0.169</b> |              |              |         |         |              |               |              |              |              |              |         |              |               |               |               |               |               |               |       |
| S    | III m | m    | s2   | P    | O       | Carterus rotundicollis Rambur 1837                  |           | Cartrotu  | <b>0.242</b> |              |              |         |         |              |               |              |              |              |              |         |              |               |               |               |               |               |               |       |
| A    | III m | m    | s2   | P    | O       | Ophonus subquadratus (Dejean 1829)                  |           | Ophosubq  | <b>0.194</b> |              |              |         |         |              |               |              |              |              |              |         |              |               |               |               |               |               |               |       |
| A    | III m | m    | s3   | P    | O       | Ophonus ardosiacus (Lutshnik 1922)                  |           | Ophoardo  | <b>0.363</b> |              |              |         |         |              |               |              |              |              |              |         |              |               |               |               |               |               |               |       |
| S    | III m | m    | s2   | Om   | O       | Harpalus attenuatus Stephens 1828                   |           | Harpatte  | <b>0.630</b> |              |              |         |         |              |               |              |              |              |              |         |              |               |               |               |               |               |               |       |
| A    | II    | b    | s2   | Om   | O       | Amara sicula Dejean 1831                            |           | Amarsicu  | <b>0.218</b> |              |              |         |         |              |               |              |              |              |              |         |              |               |               | 0.025         |               |               |               |       |
| A    | III m | b    | s1   | G    | F       | Trechus obtusus lucanus Focarile 1949               |           | Trecobtu  | <b>0.218</b> | 0.023        | 0.024        |         |         |              | 0.024         |              |              |              |              |         |              |               |               |               |               |               |               |       |
| A    | II    | b    | s2   | G    | F       | Calathus montivagus Dejean 1831                     |           | Calamont  | <b>0.508</b> | 0.023        | 0.049        |         |         |              | 0.082         | <u>0.196</u> | <u>0.174</u> | 0.106        | <u>0.266</u> | 0.025   |              | 0.045         |               |               |               |               |               |       |
| A    | V     | m    | s2   | Om   | O       | Pseudophonus griseus (Panzer 1797)                  |           | Pseugris  | 0.048        | 0.023        | <u>0.122</u> |         |         |              | <b>0.137</b>  |              | <u>0.131</u> | 0.064        |              |         |              |               |               | 0.025         |               |               |               |       |
| A    | II    | m    | s2   | Spc  | F       | Leistus spinibarbis fiorii Lutshnik 1913            |           | Leisspin  |              | 0.023        | <u>0.122</u> |         |         |              | <b>0.137</b>  |              |              |              |              |         |              |               |               |               |               |               |               |       |
| A    | III m | m    | s2   | G    | O       | Olisthopus glabricollis (Germar 1817)               | Olisglab  |           |              |              |              |         |         | <b>0.027</b> |               |              |              | 0.024        |              |         |              |               |               |               |               |               |               |       |
| S    | III   | m    | s3   | Om   | O       | Harpalus dimidiatus Dejean 1829                     | Harpdimi  | 0.048     |              |              |              |         |         | <b>0.384</b> | 0.044         | 0.106        | 0.024        |              |              |         |              |               |               |               |               |               |               |       |
| S    | III m | m    | s2   | Spc  | O       | Notiophilus geminatus Dejean & Boisduval 1830       | Notigemi  | 0.024     |              |              |              |         |         | <b>0.110</b> |               |              |              | 0.028        |              |         |              |               |               |               |               |               |               |       |
| A    | III   | m    | s2   | Spc  | F?      | Leistus fulvibarbis fulvibarbis Dejean 1826         | Leisfulv  |           |              |              |              |         |         | <b>0.110</b> | 0.022         | 0.022        |              |              |              |         | 0.025        |               |               |               |               |               |               |       |
| S    | III m | m    | s1   | G    | O       | Phyltethys (Netolitzky 1926)                        | Phylteth  |           |              |              |              |         |         | <b>0.082</b> |               |              | 0.024        |              |              |         |              |               |               |               |               |               |               |       |
| A    | III   | b    | s4   | G    | F       | Nebria kratteri Dejean & Boisduval 1830             | Nebrkrat  |           |              |              |              |         |         | <b>0.027</b> |               |              |              |              |              |         |              |               |               |               |               |               |               |       |
| S    | V     | m    | s1   | Om   | O       | Amara lucida (Duftschmid 1812)                      | Amarluci  |           |              |              |              |         |         | <b>0.055</b> |               |              |              |              |              |         |              |               |               |               |               |               |               |       |
| S    | III m | m    | s2   | G    | O       | Brachinus sclopeta (F. 1792)                        | Bracscllo |           |              |              |              |         |         | <b>1.781</b> | 0.065         | 0.065        | 0.021        |              |              |         |              |               | 0.148         |               |               |               |               |       |
| S    | V     | m    | s2   | Om   | O       | Amara aenea (Degeer 1774)                           | Amaraene  | 0.048     |              |              |              |         |         | <b>1.918</b> | 0.174         | 0.276        | 0.121        |              |              |         |              |               | 0.346         |               |               |               |               |       |
| S    | III m | m    | s1   | G    | O       | Metallina ambigua (Dejean 1831)                     | Metaambi  |           |              |              |              |         |         | <b>0.087</b> |               |              |              |              |              |         |              |               |               |               |               |               |               |       |
| S    | V     | m    | s3   | Om   | O       | Harpalus serripes serripes (Quensel 1806)           | Harpseer  |           |              |              |              |         |         | <b>0.022</b> |               |              |              |              |              |         |              |               |               |               |               |               |               |       |
| S    | V     | m    | s1   | G    | E       | Metallina lampros (Herbst 1784)                     | Metalam   |           |              |              |              |         |         | <b>0.022</b> |               |              |              |              |              |         |              |               |               |               |               |               |               |       |
| S    | III m | m    | s2   | G    | E       | Asaphidion stierlini (Heyden 1880)                  | Asapstie  |           |              |              |              |         |         | <b>0.022</b> |               |              |              |              |              |         |              |               |               |               |               |               |               |       |
| S    | IV    | m    | s2   | G    | E       | Asaphidion flavipes (L. 1761)                       | Asapflav  |           |              |              |              |         |         | <b>0.326</b> |               | 0.021        |              |              |              |         |              |               |               |               |               |               |               |       |
| A    | IV    | m    | s2   | G    | E       | Nebria brevicollis F. 1792                          | Nebrbrev  |           |              |              |              |         |         | 0.022        |               |              |              | <b>0.025</b> |              |         |              |               |               |               |               |               |               |       |
| S    | III m | d    | s2   | Om   | O       | Harpalus sulphuripes sulphuripes Germar 1824        | Harpsulp  | 0.048     |              |              |              |         |         | <u>0.164</u> | <b>0.283</b>  | 0.152        |              |              |              |         |              |               |               |               |               |               |               |       |
| A    | III m | m    | s2   | G    | O       | Calathus circumseptus Germar 1824                   | Calacirc  |           |              |              |              |         |         |              |               |              |              | <b>0.022</b> |              |         |              |               |               |               |               |               |               |       |
| A    | V     | m    | s2   | P    | F       | Cryptophonus tenebrosus (Dejean 1829)               | Cryptene  |           |              |              |              |         |         |              |               |              |              | <b>0.022</b> |              |         |              |               |               |               |               |               |               |       |
| S    | IV    | m    | s2   | Om   | O       | Harpalus smaragdinus (Duftschmid 1812)              | Harp smar |           |              |              |              |         |         | 0.027        | 0.174         | <b>1.959</b> | 0.149        |              |              |         |              |               |               |               |               |               |               |       |
| S    | IV    | m    | s2   | Om   | O       | Parophonus hirsutulus (Dejean 1829)                 | Parohirs  |           |              |              |              |         |         |              |               |              |              | <b>0.021</b> |              |         |              |               |               |               |               |               |               |       |
| S    | V     | m    | s2   | Om   | F       | Harpalus tardus (Panzer 1797)                       | Harp tard |           |              |              |              |         |         |              |               |              |              | <b>0.021</b> |              |         |              |               |               |               |               |               |               |       |
| S    | III   | m    | s3   | Om   | E       | Anisodactylus binotatus (F. 1787)                   | Anisbino  |           |              |              |              |         |         | 0.022        |               |              |              | <b>0.064</b> |              |         |              |               |               |               |               |               |               |       |
| S    | III   | m    | s2   | Om   | F       | Amara anthobia Villa & Villa 1833                   | Amaranth  |           |              |              |              |         |         |              |               |              |              | <b>0.022</b> | 0.021        |         |              |               |               |               |               |               |               |       |
| S    | IV    | m    | s2   | G    | F       | Brachinus explodens (Duftschmid 1812)               | Bracexpl  |           |              |              |              |         |         |              |               |              |              | <b>0.022</b> | 0.021        |         |              |               |               |               |               |               |               |       |
| S    | V     | m    | s2   | Om   | O       | Anchomenus dorsalis (Pontoppidan 1763)              | Anchdors  |           |              |              |              |         |         | <u>0.082</u> | 0.044         | <u>0.087</u> | <b>0.106</b> |              |              |         |              |               |               |               |               |               |               |       |
| S    | III   | m    | s2   | Om   | O       | Harpalus distinguendus (Duftschmid 1812)            | Harpdist  | 0.169     | 0.023        |              |              |         |         | <u>0.247</u> | 0.196         | <u>0.261</u> | <b>0.510</b> |              |              |         |              |               | 0.148         |               |               |               |               |       |
| S    | III   | m    | s2   | Om   | O       | Parophonus maculicornis (Duftschmid 1812)           | Paromacu  |           |              |              |              |         |         | 0.027        | 0.065         | 0.044        | <b>0.170</b> |              |              |         |              |               |               |               |               |               |               |       |
| A    | V     | m    | s3   | Om   | E       | Pseudophonus rufipes (Degeer 1774)                  | Pseurufi  | 0.266     | 0.023        |              |              |         |         | <u>1.260</u> | <u>1.545</u>  | <u>1.937</u> | <b>3.885</b> | 0.048        | 0.076        | 0.056   | 0.023        | 0.025         | 0.025         | 0.047         | 0.023         | 0.025         |               |       |
| A    | III   | b    | s4   | G    | F       | Pterostichus melas italicus (Dejean 1828)           | Ptermela  | 0.751     | 0.557        | 0.998        |              |         |         | 1.479        | 1.219         | 2.089        | <b>9.894</b> | 2.179        | 1.751        | 1.653   | <u>3.108</u> | 1.131         | 2.172         | <u>6.584</u>  | <u>3.626</u>  | <u>5.075</u>  | 0.296         |       |
| S    | IV    | m    | s3   | Spc  | O       | Siagona europaea Dejean 1826                        | Siageuro  |           |              |              |              |         |         |              |               |              |              | <b>0.051</b> | 0.028        |         |              |               |               |               |               |               |               |       |
| A    | III   | m    | s3   | Spc  | O       | Licinus silphoides (Rossi 1790)                     | Licisilp  |           |              |              |              |         |         |              |               |              |              | <b>0.127</b> |              |         |              |               |               |               | 0.047         | 0.025         |               |       |
| A    | III m | m    | s4   | Om   | O       | Zabrus ignavus ignavus Csiki 1907                   | Zabrigna  |           |              |              |              |         |         |              |               |              |              |              |              |         |              |               |               |               |               | <b>0.198</b>  |               |       |
| S    | III m | m    | s2   | Om   | O       | Parophonus planicollis (Dejean 1829)                | Paroplan  |           |              | <b>0.023</b> |              |         |         |              |               |              |              |              |              |         |              |               |               |               |               |               |               |       |
| ?    | III m | m    | s2   | G    | F       | Pseudomasoreus canigoulensis (Fairmaire 1854)       | Pseucani  |           |              |              |              |         |         |              |               |              | 0.021        |              |              |         |              |               |               |               |               |               |               |       |
| A    | IV    | m    | s1   | G    | E       | Trechus quadristriatus (Schrank 1781)               | Trecquad  | 0.024     |              | <b>0.049</b> |              |         |         |              |               |              | 0.024        |              |              |         |              |               |               |               |               |               |               |       |
| A    | III m | d    | s3   | G    | E       | Calathus fuscipes graecus Dejean 1831               | Calafusc  | 0.460     | 0.719        | 0.706        |              |         |         | 1.918        | <u>10.076</u> | 4.701        | 0.786        | 1.380        | 2.817        | 2.717   | 4.212        | <u>12.688</u> | <u>13.871</u> | <u>11.347</u> | <b>31.919</b> | <u>19.562</u> | <u>17.975</u> |       |
| A    | IV    | m    | s4   | Om   | O       | Zabrus tenebrioides tenebrioides (Goeze 1777)       | Zabrtene  |           |              |              |              |         |         |              |               |              |              |              |              |         |              |               |               |               |               |               |               |       |
| A    | III m | m    | s3   | P    | O       | Ophonus incisus (Dejean 1829)                       | Ophoinci  |           |              |              |              |         |         |              |               |              |              |              |              |         |              |               |               |               |               |               |               |       |
| A    | V     | b    | s2   | G    | O       | Calathus cinctus Motschulsky 1850                   | Calacinc  | 0.024     | 0.116        |              |              |         |         | 0.027        | 0.479         | 0.283        |              | 0.024        | 0.406        | 0.168   | <u>1.599</u> | <u>0.829</u>  | <u>1.312</u>  | <u>2.668</u>  | <u>1.374</u>  | <b>2.930</b>  | 0.123         |       |
| A    | III   | b    | s4   | G    | F       | Laemostenus cimmerius (Fischer-Waldheim 1823)       | Laemcimm  |           |              |              |              |         |         |              | 0.087         | 0.022        | 0.085        |              |              |         |              | 0.090         | <u>0.704</u>  | <u>0.581</u>  | <u>0.623</u>  | <u>0.545</u>  | <b>1.176</b>  | 0.198 |
| A    | II    | b    | s7   | G    | O       | Carabus coriaceus mediterraneus Born 1906           | Caracori  | 0.048     |              | 0.024        |              |         |         | 0.027        |               |              |              | 0.024        | 0.051        |         | <u>0.270</u> | <b>0.930</b>  | <u>0.344</u>  | <u>0.424</u>  | 0.071         | <u>0.277</u>  | 0.025         |       |
| S    | V     | m    | s2   | G    | O       | Brachinus crepitans (L. 1758)                       | Braccrep  |           |              |              |              |         |         | 0.082        |               |              |              |              |              |         | 0.045        | <b>0.302</b>  | 0.151         | <u>0.299</u>  |               |               |               |       |
| S    | III m | m    | s3   | P    | O       | Graniger cordicollis (Serville 1821)                | Grancord  |           |              |              |              |         |         |              |               |              |              |              |              |         |              | <b>0.050</b>  |               |               |               |               |               |       |
| S    | II    | b    | s3   | G    | E       | Brachinus italicus (Dejean 1831)                    | Bracital  |           |              |              |              |         |         |              |               |              |              |              |              |         |              | 0.158         | 0.226         | 0.172         | <b>1.222</b>  |               | 0.115         |       |
| S    | III m | m    | s3   | P    | O       | Tschitscherinellus cordatus (Dejean 1825)           | Tschcord  |           |              |              |              |         |         |              |               |              |              |              |              |         |              | 0.023         |               |               | <b>0.025</b>  |               |               |       |
| S    | III m | m    | s3   | Om   | O       | Scybalicus oblongiusculus (Dejean 1829)             | Scyboblo  |           |              |              |              |         |         |              |               |              |              | 0.025        |              |         | <u>0.833</u> | 0.628         | <u>1.204</u>  | <b>1.421</b>  |               | 0.138         |               |       |
| S    | III m | m    | s3   | G    | O       | Dinodes decipiens (Dufour 1820)                     | Dinodeci  |           |              |              |              |         |         |              |               |              |              | <b>0.048</b> |              |         |              | 0.025         | 0.022         | 0.025         |               |               |               |       |
| A    | IV    | m    | s3   | P    | O       | Ophonus sabulicola (Panzer 1796)                    | Ophosabu  | 0.024     |              |              |              |         |         |              |               |              |              |              |              |         |              |               | <b>0.075</b>  |               | 0.025         |               |               |       |
|      |       |      |      |      |         | aAD                                                 | 5.4       | 1.6       | 2.1          | 10.4         | 15.1         | 12.1    | 16.3    | 4.2          | 5.4           | 4.7          | 10.4         |              |              |         |              |               |               |               |               |               |               |       |
|      |       |      |      |      |         | n.species                                           | 25        | 10        | 9            | 28           | 21           | 19      | 20      | 13           | 11            | 7            | 12           |              |              |         |              |               |               |               |               |               |               |       |
|      |       |      |      |      |         | ARC5                                                | ARC2      | ARC1      | ARC3         | MIR1         | MIR2         | MIR4    | ARC4    | LIR1         | LIR2          | TER5         | TER1         | TER2         | TER6         | TER3    | TER4         | TER7          |               |               |               |               |               |       |
