# Supplementary material for: Ground beetles in Mediterranean olive agroecosystems: Their significance and functional role as bioindicators (Coleoptera, Carabidae)
Source: PubMed Central journal article supplement (PMC5860759; doi:10.1371/journal.pone.0194551), 2018-03-20
Supplement: pone.0194551.s002.pdf [file pone.0194551.s002.pdf]

**S2 Table. PCA coordinates.** Sample sites ordination on the basis of PCA axis 1 (S2.1 Table), axis 2 (S2.2 Table) and axis 3 (S2.3 Table).

S2.1 Table

| site   | Axis 1 | m asl | managment     | soil      | veg     |
|--------|--------|-------|---------------|-----------|---------|
| TER6hc | -4,03  | 45    | half-cropland | clay      | sclerof |
| TER1hc | -3,09  | 75    | half-cropland | clay      | sclerof |
| TER4hc | -2,83  | 60    | half-cropland | clay      | sclerof |
| TER2hc | -2,61  | 73    | half-cropland | clay      | sclerof |
| TER3hc | -2,4   | 71    | half-cropland | clay      | sclerof |
| TER5hc | -2,29  | 50    | half-cropland | clay      | sclerof |
| REN6cc | -1,37  | 206   | cover-cropped | sand-clay | Q.virg  |
| TER7cc | -0,95  | 170   | cover-cropped | sand-clay | sclerof |
| REN7cc | -0,92  | 210   | cover-cropped | sand-clay | Q.virg  |
| REN2ti | -0,79  | 300   | tilled        | sand-clay | Q.virg  |
| REN4ti | -0,13  | 300   | tilled        | sand-clay | Q.virg  |
| REN1ti | 0,29   | 300   | tilled        | sand-clay | Q.virg  |
| MIR1cc | 0,5    | 5     | cover-cropped | alluv     | mix.for |
| MIR2cc | 1,56   | 5     | cover-cropped | alluv     | mix.for |
| MIR4cc | 1,77   | 5     | cover-cropped | alluv     | mix.for |
| REN3ti | 7,18   | 300   | tilled        | sand-clay | Q.virg  |
| REN5cc | 10,12  | 300   | cover-cropped | sand-clay | Q.virg  |

S2.2 Table

| <b>site</b> | <b>Axis 2</b> | <b>m asl</b> | <b>managment</b> | <b>soil</b> | <b>veg</b> |
|-------------|---------------|--------------|------------------|-------------|------------|
| REN5cc      | -8,81         | 300          | cover-cropped    | sand-clay   | Q.virg     |
| TER1hc      | -2,1          | 75           | half-cropland    | clay        | Med. ev.   |
| TER6hc      | -1,77         | 45           | half-cropland    | clay        | Med. ev.   |
| TER3hc      | -1,46         | 71           | half-cropland    | clay        | Med. ev.   |
| TER2hc      | -1,16         | 73           | half-cropland    | clay        | Med. ev.   |
| TER4hc      | -1,02         | 60           | half-cropland    | clay        | Med. ev.   |
| TER5hc      | -1            | 50           | half-cropland    | clay        | Med. ev.   |
| REN6cc      | -0,53         | 206          | cover-cropped    | sand-clay   | Q.virg     |
| REN4ti      | -0,5          | 300          | tilled           | sand-clay   | Q.virg     |
| TER7cc      | -0,4          | 170          | cover-cropped    | sand-clay   | Med. ev.   |
| REN2ti      | -0,38         | 300          | tilled           | sand-clay   | Q.virg     |
| REN7cc      | -0,33         | 210          | cover-cropped    | sand-clay   | Q.virg     |
| REN1ti      | 0,04          | 300          | tilled           | sand-clay   | Q.virg     |
| MIR1cc      | 3,04          | 5            | cover-cropped    | alluv       | mix.for    |
| MIR2cc      | 4,14          | 5            | cover-cropped    | alluv       | mix.for    |
| REN3ti      | 5,99          | 300          | tilled           | sand-clay   | Q.virg     |
| MIR4cc      | 6,24          | 5            | cover-cropped    | alluv       | mix.for    |

S2.3 Table

| site   | Axis 3 | m asl | managment     | soil      | veg      |
|--------|--------|-------|---------------|-----------|----------|
| REN3ti | -8,36  | 300   | tilled        | sand-clay | Q.virg   |
| TER6hc | -2,01  | 45    | half-cropland | clay      | Med. ev. |
| TER1hc | -1,4   | 75    | half-cropland | clay      | Med. ev. |
| REN4ti | -0,99  | 300   | tilled        | sand-clay | Q.virg   |
| TER2hc | -0,85  | 73    | half-cropland | clay      | Med. ev. |
| TER5hc | -0,65  | 50    | half-cropland | clay      | Med. ev. |
| TER4hc | -0,46  | 60    | half-cropland | clay      | Med. ev. |
| REN1ti | -0,36  | 300   | tilled        | sand-clay | Q.virg   |
| TER3hc | -0,21  | 71    | half-cropland | clay      | Med. ev. |
| REN7cc | -0,2   | 210   | cover-cropped | sand-clay | Q.virg   |
| TER7cc | -0,15  | 170   | cover-cropped | sand-clay | Med. ev. |
| REN2ti | -0,1   | 300   | tilled        | sand-clay | Q.virg   |
| REN6cc | 0,34   | 206   | cover-cropped | sand-clay | Q.virg   |
| REN5cc | 2,43   | 300   | cover-cropped | sand-clay | Q.virg   |
| MIR2cc | 3,41   | 5     | cover-cropped | alluv     | mix.for  |
| MIR1cc | 3,64   | 5     | cover-cropped | alluv     | mix.for  |
| MIR4cc | 5,92   | 5     | cover-cropped | alluv     | mix.for  |
